# Supplementary material for: The decline in synaptic GluN2B and rise in inhibitory neurotransmission determine the end of a critical period
Source: PubMed Central journal article supplement (PMC5039748; doi:10.1038/srep34196), 2016-09-28
Supplement: srep34196-s1.pdf [file srep34196-s1.pdf]

# **The decline in synaptic GluN2B and rise in inhibitory neurotransmission determine the end of a critical period**

Noriko Isoo, Takae Ohno, Mutsumi Isowaki, Satoshi Fukuda, Naoyuki Murabe, Hiroaki Mizukami, Keiya Ozawa, Masayoshi Mishina, and Masaki Sakurai

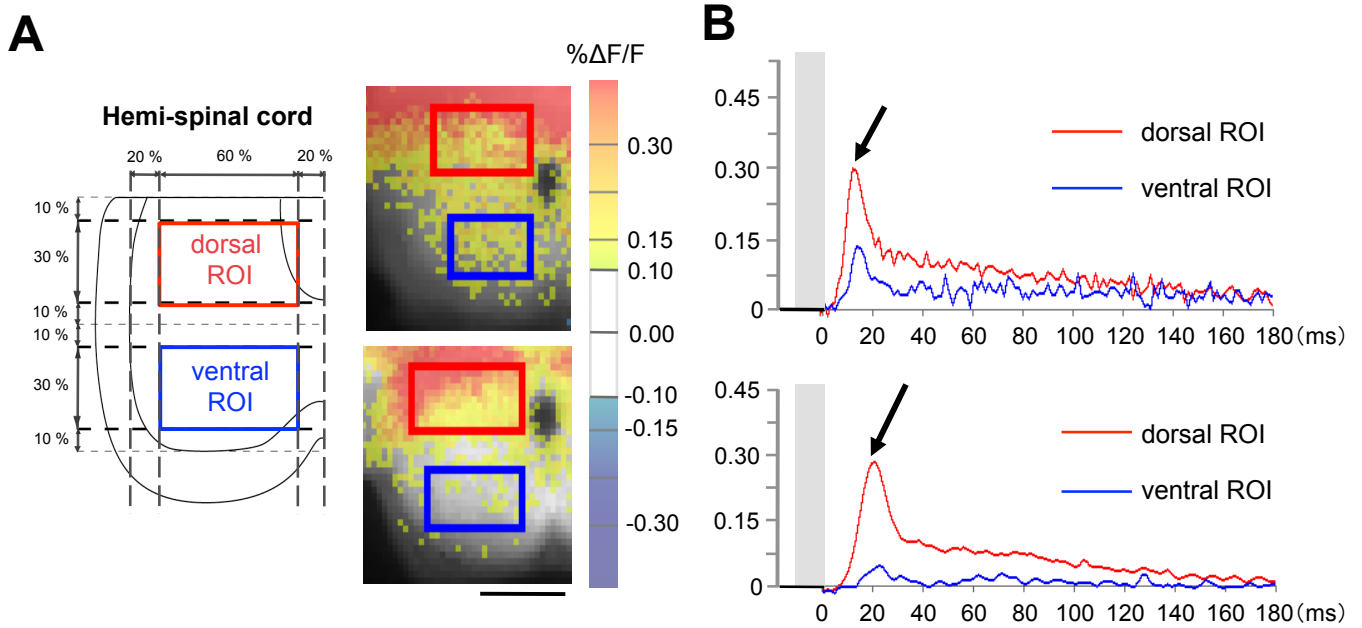

**Supplementary Figure 1S Time course of optical CS-EPSPs recorded in dorsal and ventral ROIs in the spinal cord.**

**(A)** ROIs in dorsal (red) and ventral (blue) hemi-spinal cord established for analyzing optical CS-EPSPs were shown. Scale bar = 250  $\mu\text{m}$ . **(B)** The red and blue traces were optical signals recorded in the ROIs indicated on the images. ROI, regions of interest.

**A**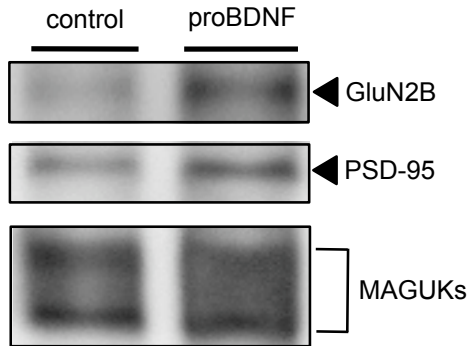**B**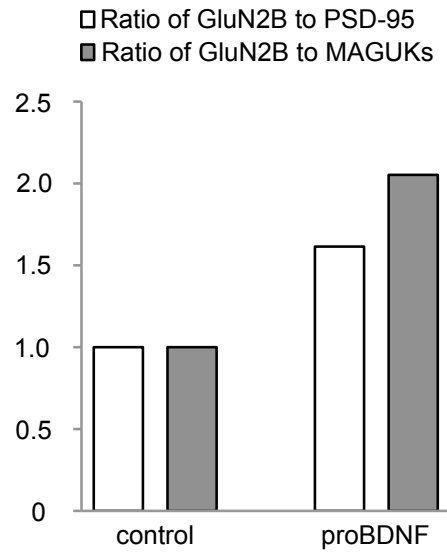

### Supplementary Figure 2S Upregulation of synaptic 2B by proBDNF treatment.

**(A)** Immunoblot analysis of synaptic expression of 2B, PSD-95 and MAGUKs in control and proBDNF-treated spinal cords. **(B)** Ratios of 2B in SPMs to PSD-95 or MAGUK in SPMs in control or proBDNF-treated spinal explants at 16 DIV (Ratio of 2B for PSD-95: 1.00, control; 1.61, proBDNF-treated. Ratio of 2B for MAGUKs: 1.00, control; 2.05, proBDNF-treated. Each sample is an SPM extract prepared from 20 co-cultures from 4 mice).

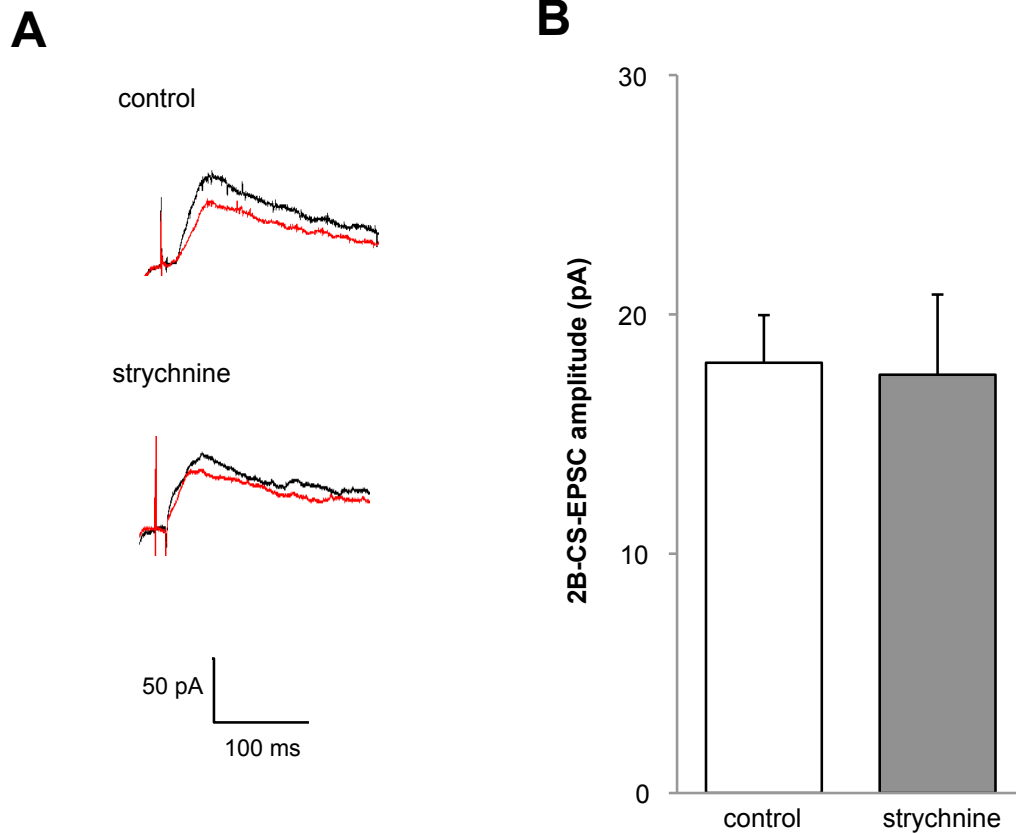

**Supplementary Figure 3S No alterations in 2B-CS-EPSCs in control or strychnine-treated spinal explants.**

**(A)** Averaged CS-EPSC traces recorded in control (top) or strychnine-treated (bottom) spinal explants before (black) or after (red) Ro25-6981 application at 12 DIV. **(B)** Averaged amplitudes of 2B-CS-EPSCs in control or strychnine-treated spinal explants at 12-15 DIV (control: n = 18, Ns = 10, Nm = 20; strychnine: n = 18, Ns = 12, Nm = 24). Calibration, 50 pA, 100 ms.

**A**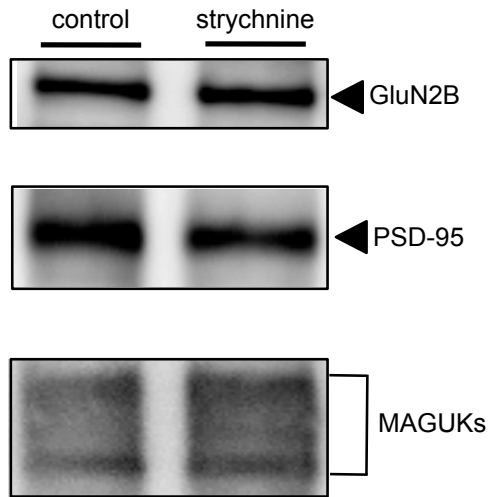**B**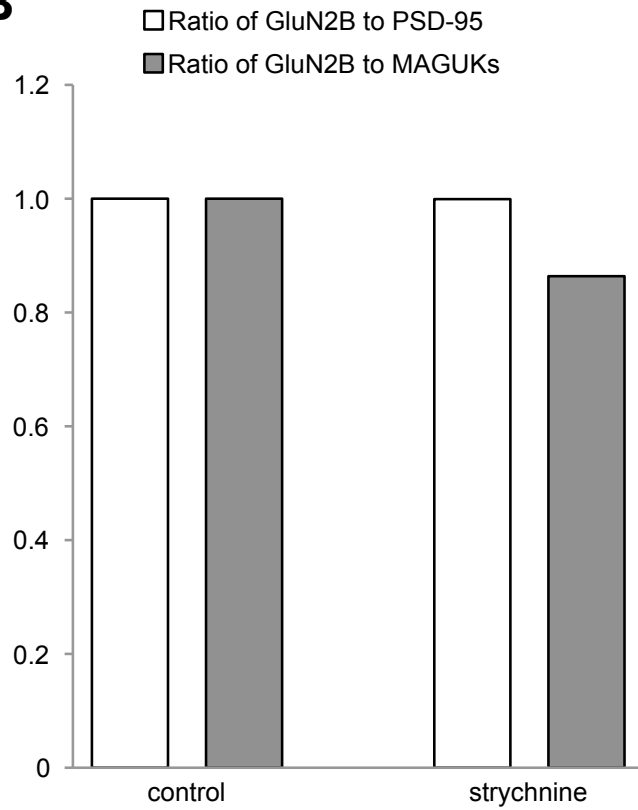

**Supplementary Figure 4S Blockade of the inhibitory activity in the spinal cord.**

**(A)** Immunoblot analysis of 2B, PSD-95 and MAGUKs in SPMs in control or strychnine-treated spinal cords. **(B)** Intensity of 2B in SPMs was normalized to that of PSD-95 or MAGUK in SPMs (ratio of 2B to PSD-95: 1.00 in control, 1.00 in strychnine-treated, ratio of 2B to MAGUKs: 1.00 in control, 0.86 in strychnine-treated, each sample is an SPM extract from 20 co-cultures from 4 mice).

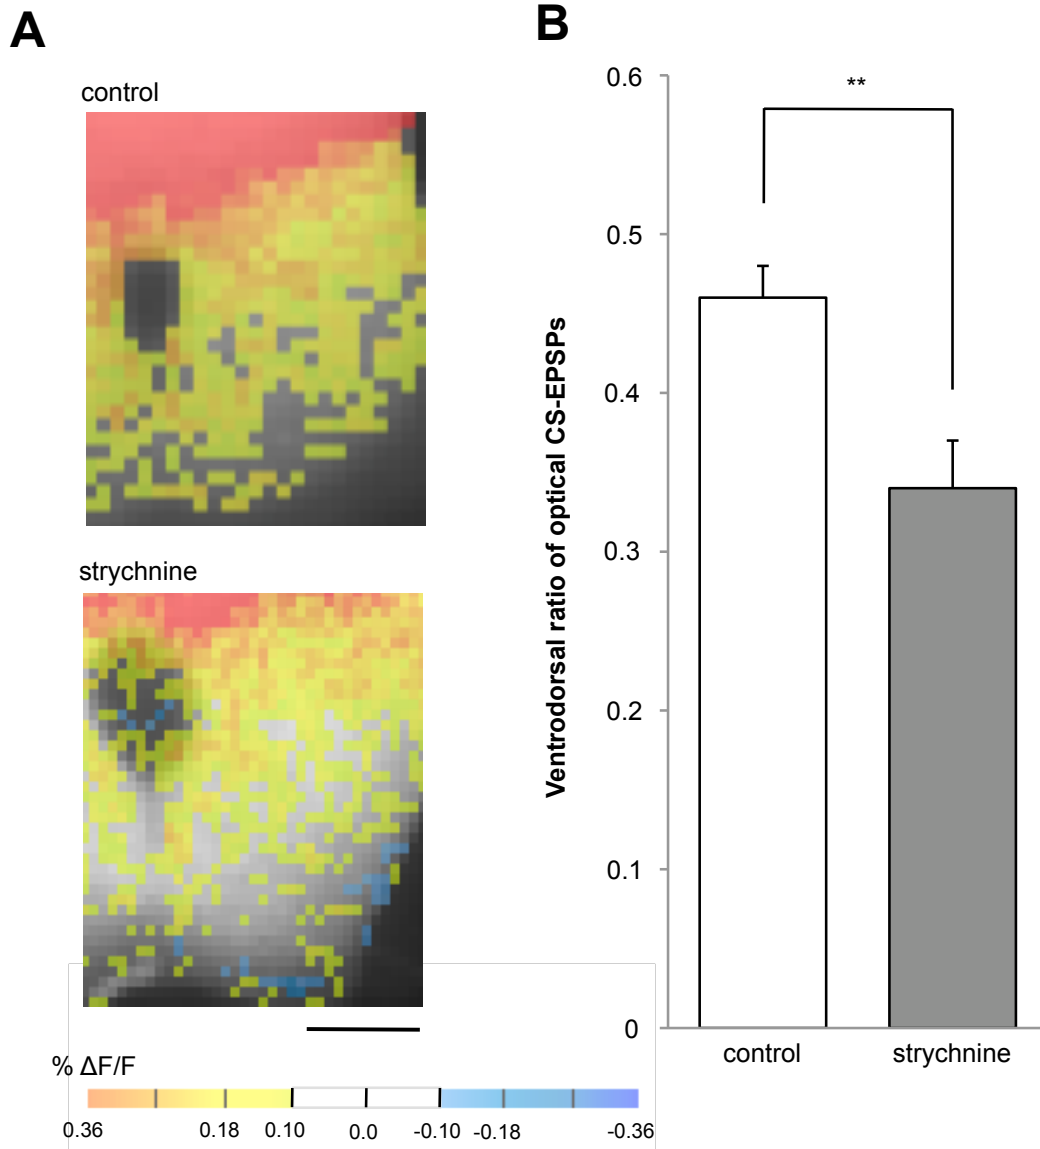

**Supplementary Figure 5S CS synapses in the ventral spinal cord were eliminated by strychnine treatment.**

**(A)** Spatial distribution of CS synapses determined using optical CS-EPSPs in control (top) or strychnine-treated (bottom) spinal explants. Scale bar = 250  $\mu\text{m}$ .

**(B)** Ventrodorsal ratios of optical CS-EPSPs in control ( $0.46 \pm 0.02$ ,  $n = 17$ ,  $N_s = 17$ ,  $N_m = 8$ ) and strychnine-treated ( $0.34 \pm 0.03$ ,  $n = 8$ ,  $N_s = 8$ ,  $N_m = 6$ ) spinal explants at 14-16 DIV.

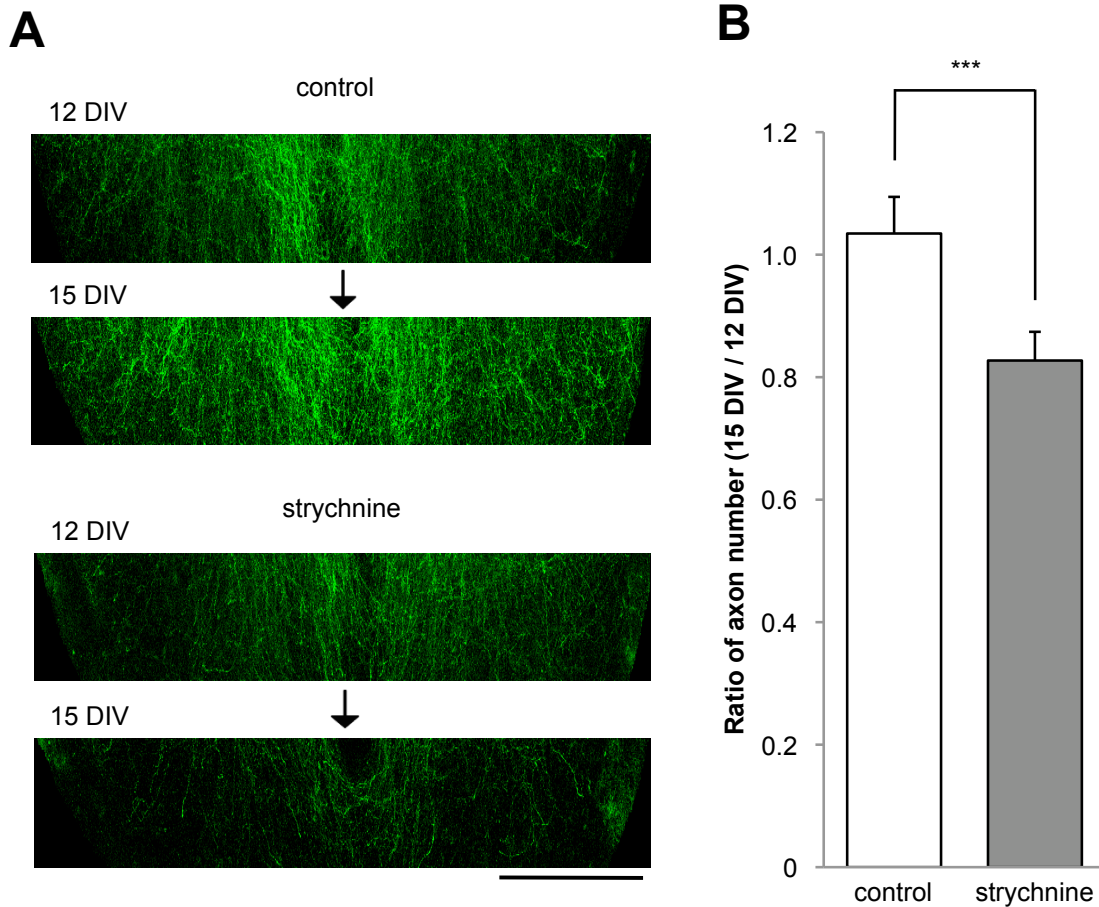

**Supplementary Figure 6S Strychnine elicited regression of CS axons on the ventral side of the spinal cord.**

**(A)** Images of CS axons on the ventral side that crossed the 70% line from the dorsal to the ventral edge of spinal gray matter in control (top) and strychnine-treated (bottom) spinal explants. The first and second images were taken at 12 and 15 DIV, respectively. **(B)** Ratio of the number of CS axons at 15 DIV to that at 12 DIV ( $1.03 \pm 0.06$  in control,  $n = 9$ ,  $N_s = 9$ ,  $N_m = 4$ ;  $0.83 \pm 0.05$  in strychnine-treated,  $n = 10$ ,  $N_s = 10$ ,  $N_m = 4$ ).

Fig. 1C (upper blot)

Fig. 1C (middle blot)

Fig. 1C (lower blot)

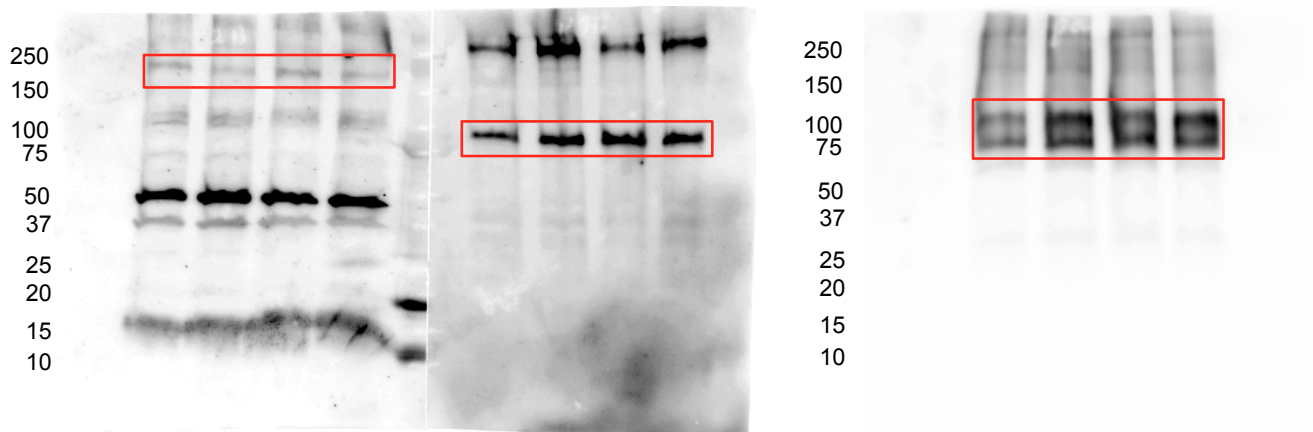

**Supplementary Figure 7S Uncropped western blots.**

The red boxes indicate the cropped regions.
